# Supplementary material for: Synthesis and crystal structures of two tri- and tetra-heterometallic Ni(ii)–Mn(ii)/Ni(ii)–Co(iii) complexes from two different Ni(ii)-containing metalloligands: effective catalytic oxidase activity and Schottky device approach
Source: Royal Society of Chemistry journal article supplement (doi:10.1039/d2nj03535a), 2022-01-01
Supplement: d2nj03535a1.pdf [file d2nj03535a1.pdf]

## **Supporting information file**

### **Synthesis, Crystal Structures of Two Tri and Tetra Heterometallic Ni (II)-Mn (II)/Ni (II)-Co (III) Complexes from Two Different Ni (II) Containing Metalloligand: Effective Catalytic Oxidase Activity and Schottky Device Approach**

Manik Das<sup>a</sup>, Mainak Das<sup>b</sup>, Subham Ray<sup>a</sup>, Uttam Kumar Das<sup>c</sup>, Soumik Laha<sup>d</sup>, Partha Pratim Roy<sup>b</sup>, Bidhan Chandra Samanta<sup>e</sup>, Tithi Maity<sup>a\*</sup>

<sup>a</sup> Department of Chemistry, Prabhat Kumar College, Contai, Contai, Purba Medinipur, West Bengal, India

<sup>b</sup> Department of Physics, Jadavpur University, Kolkata, India

<sup>c</sup> Department of Chemistry, School of Physical Science, Mahatma Gandhi Central University, Bihar, India.

<sup>d</sup> IICB, Kolkata, West Bengal, India

<sup>e</sup> Mugberia Gangadhar Mahavidyalaya, Purbamedinipur, West Bengal India

Email: [titlipkc2008@gmail.com](mailto:titlipkc2008@gmail.com)

## List of Figures and tables

| <b>Figure Number</b> | <b>Figure caption</b>                                                                                                                                                      | <b>Page number</b> |
|----------------------|----------------------------------------------------------------------------------------------------------------------------------------------------------------------------|--------------------|
| <b>Fig. S1</b>       | FTIR spectrum of complex <b>1</b>                                                                                                                                          | <b>S3</b>          |
| <b>Fig. S2</b>       | FTIR spectrum of complex <b>2</b>                                                                                                                                          | <b>S4</b>          |
| <b>Fig. S3</b>       | UV spectrum of a) complex <b>1</b> b) complex <b>2</b>                                                                                                                     | <b>S5</b>          |
| <b>Fig. S4</b>       | ESI-MS analyses of complex <b>1</b>                                                                                                                                        | <b>S6</b>          |
| <b>Fig. S5</b>       | ESI-MS analyses of complex <b>2</b>                                                                                                                                        | <b>S6</b>          |
| <b>Fig. S6</b>       | TGA plot of complex <b>1</b>                                                                                                                                               | <b>S7</b>          |
| <b>Fig. S7</b>       | ESI-MS analyses with isotopic distribution of complex <b>1</b> with 3,5-DTBC                                                                                               | <b>S8</b>          |
| <b>Fig. S8</b>       | ESI-MS analyses with isotopic distribution of complex <b>2</b> with 3,5-DTBC                                                                                               | <b>S9</b>          |
| <b>Fig. S9</b>       | Change of absorbance plot with respect to time for estimation of H <sub>2</sub> O <sub>2</sub> , generated during catalysis in presence of complexes <b>1</b> and <b>2</b> | <b>S10</b>         |
| <b>Fig. S10</b>      | Band gap energy plot of complex <b>1, 2</b>                                                                                                                                | <b>S11</b>         |

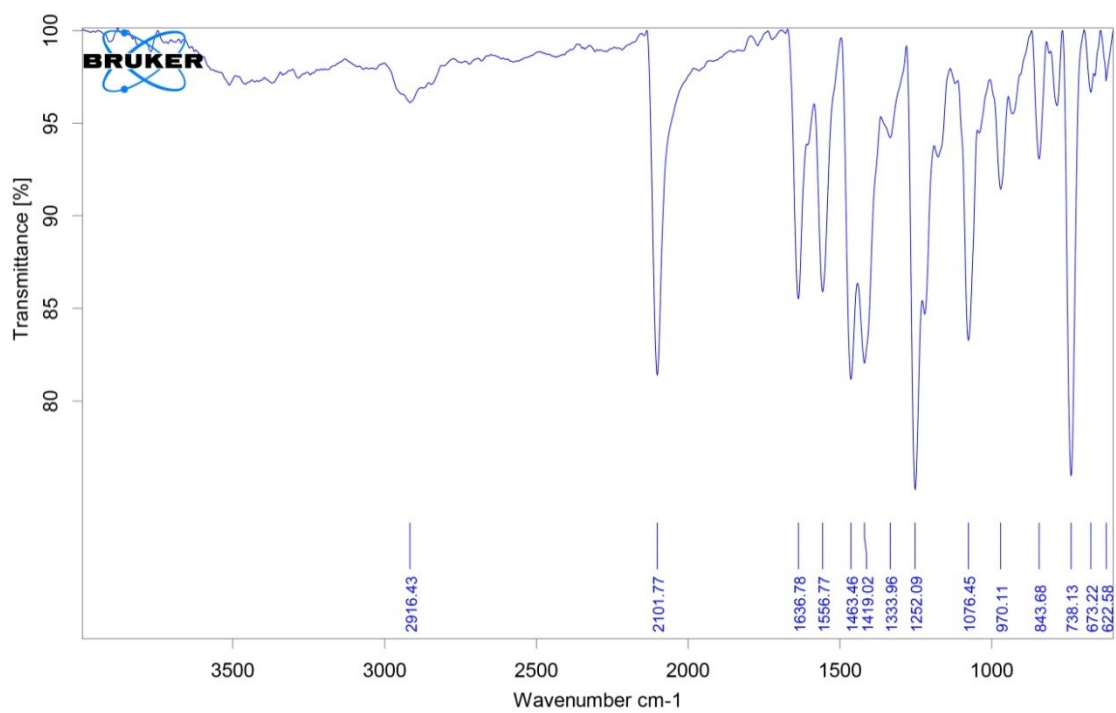

**Fig. S1:** FT IR spectrum of complex **1**

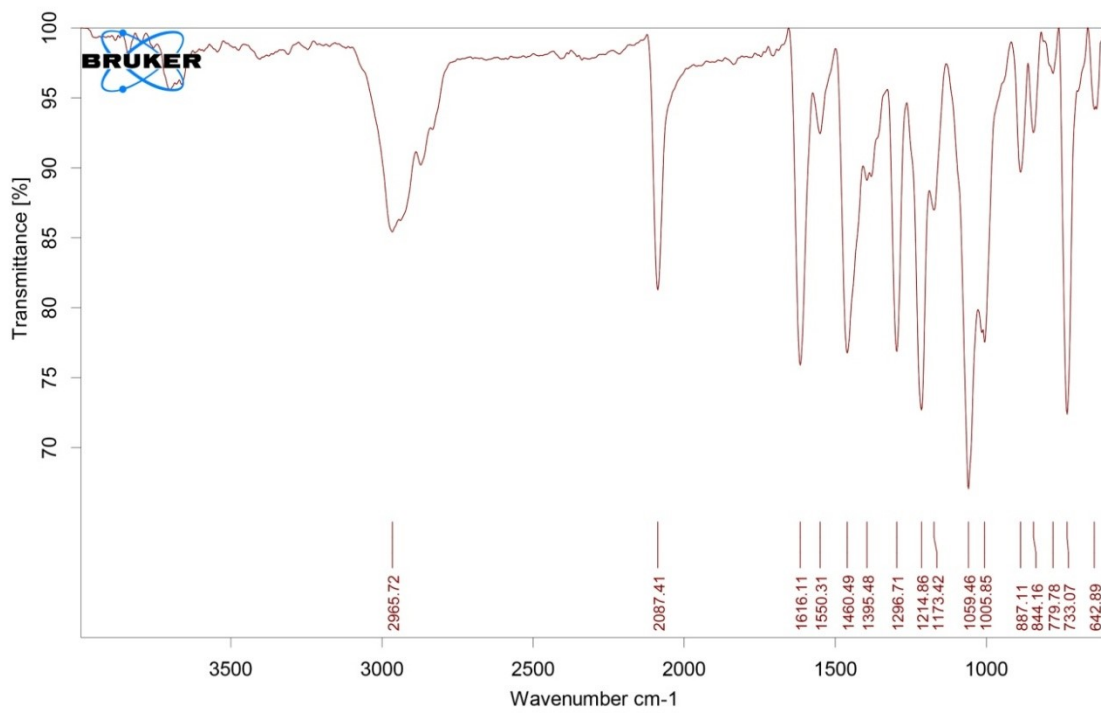

**Fig. S2:** FT IR spectrum of complex 2

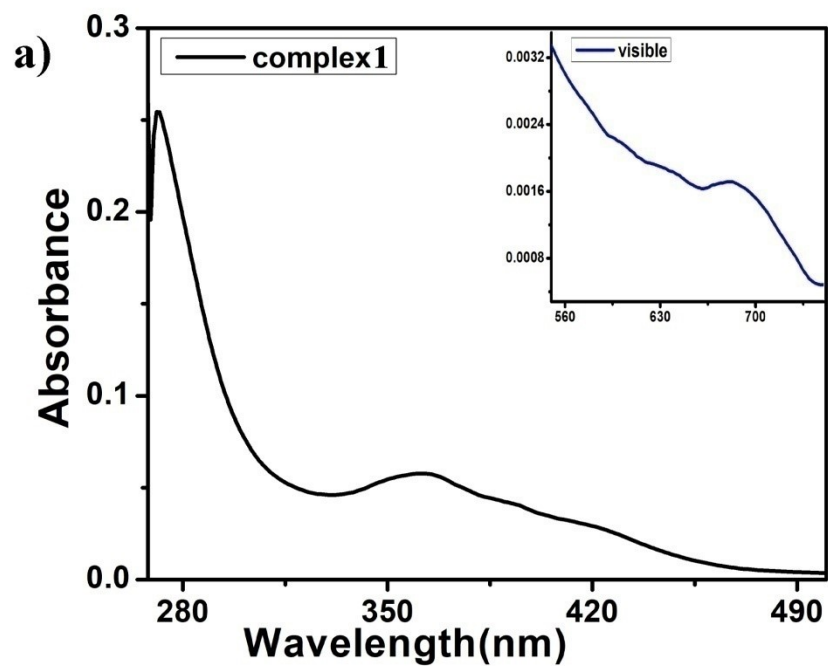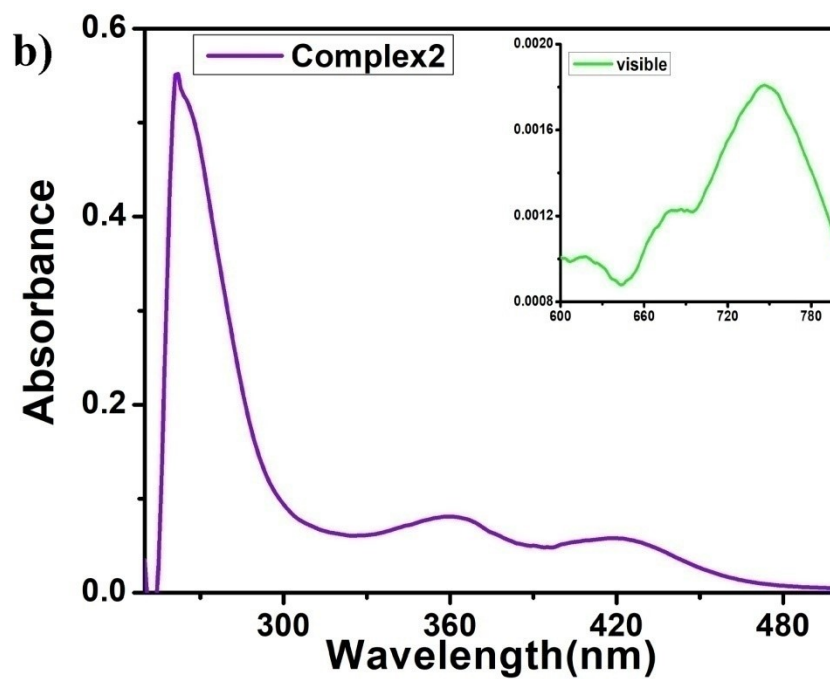

Fig. S3: UV spectrum of a) complex 1 b) complex 2

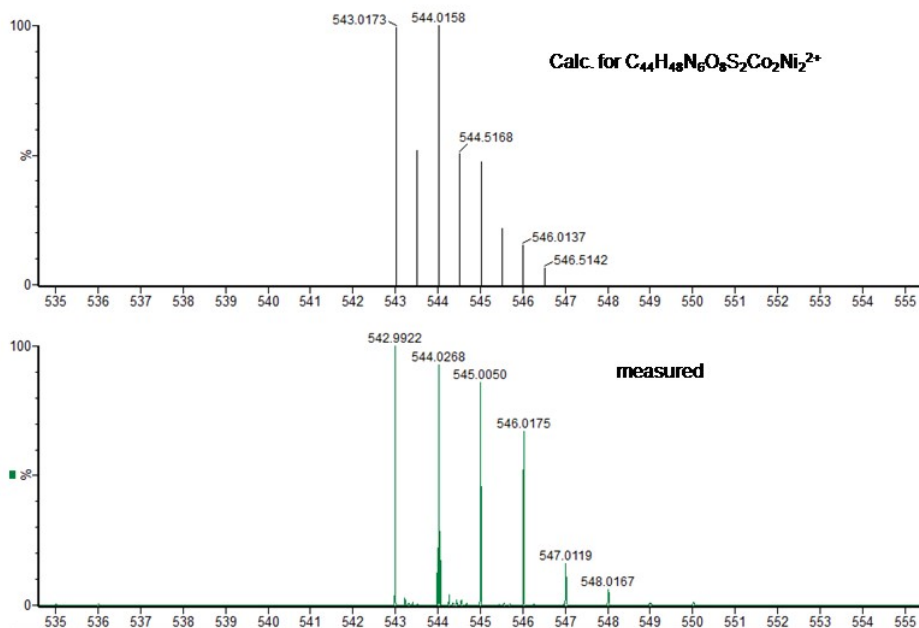

**Fig. 4:** ESI-MS analyses of complex 1

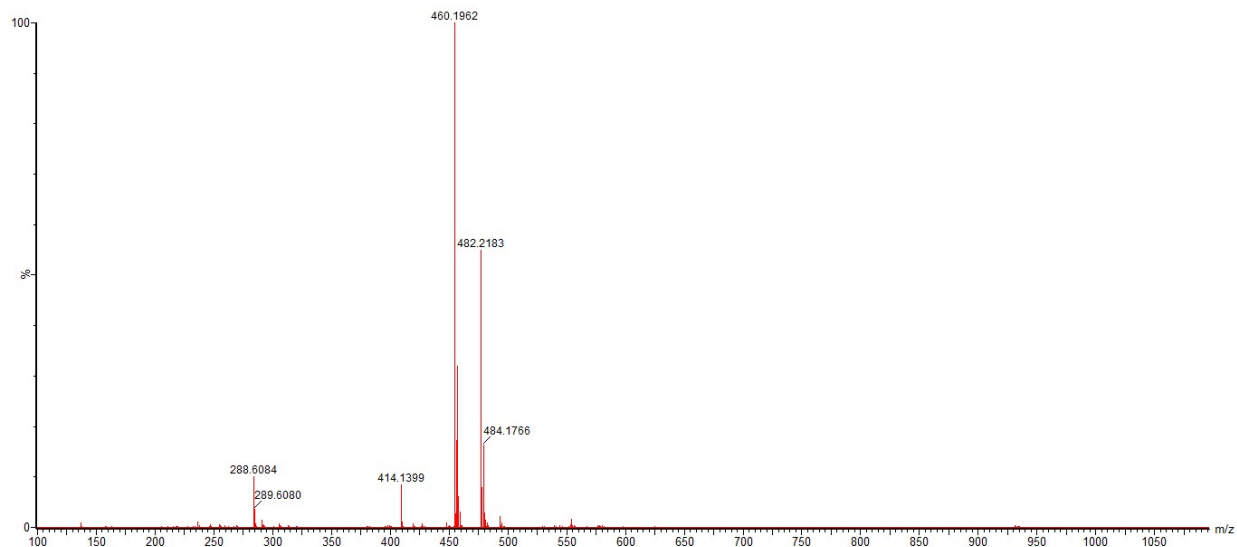

**Fig. S5:** ESI-MS analyses of complex 2

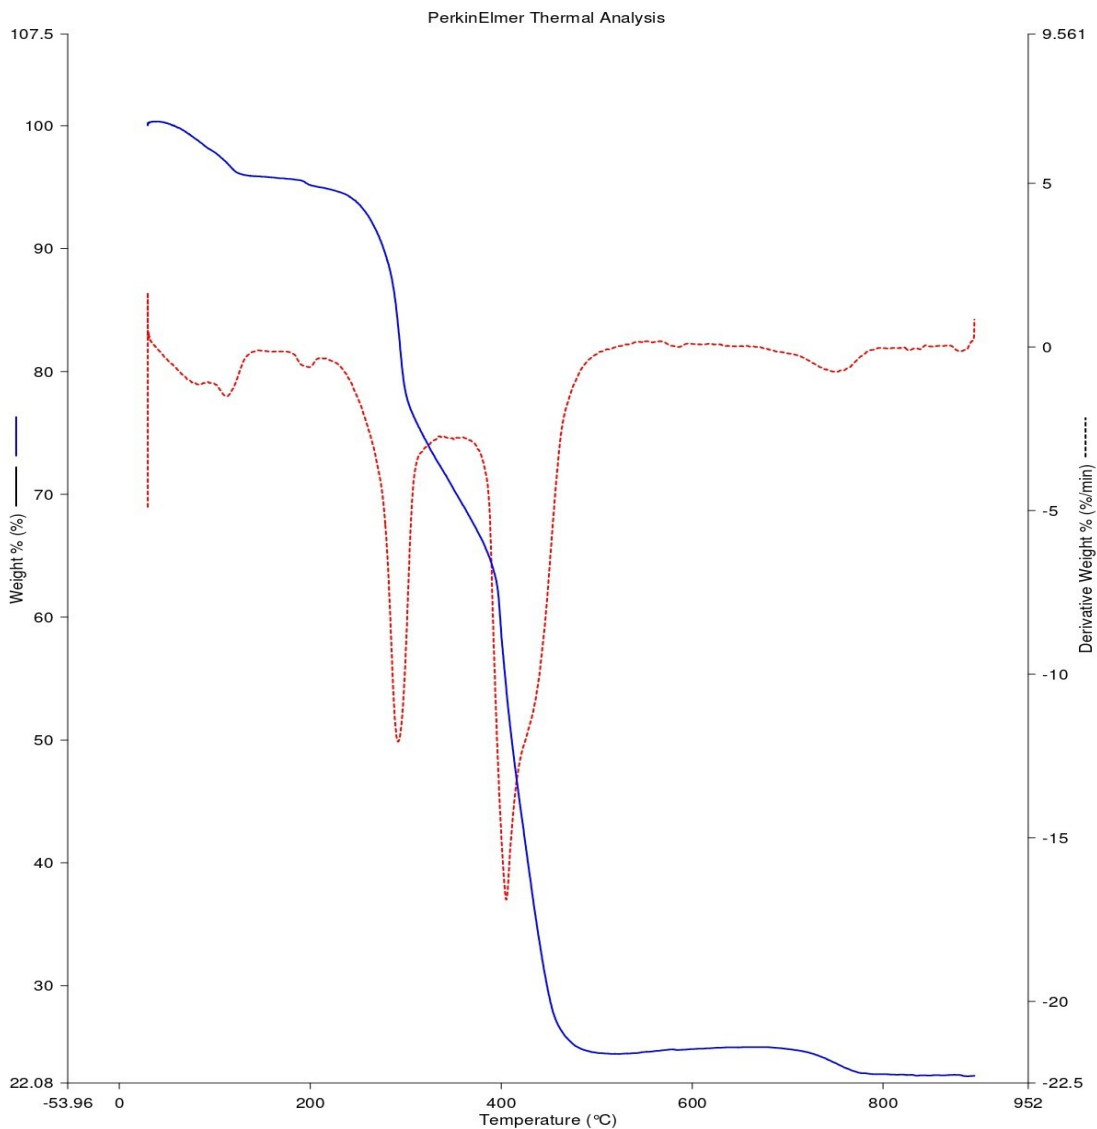

**Fig. S6:** TGA plot of complex 1

**Weight loss calculation:**

Orthorhombic Pccn space group,  $Z=4$

Therefore  $FW = \text{unit cell contents} / Z$

$$= 1206 + 117 \text{ electrons (squeeze results)}$$

$$= 1206 + 4 \text{ water molecules squeezed}$$

$$= 1206 + 4 \times 18$$

$$= 1206 + 72$$

$$= 1278$$

$$\text{Weight loss for four water molecules} = 72/1278 \times 100 \%$$

$$= 5.36 \% \text{ (obtained: } 5.31 \%)$$

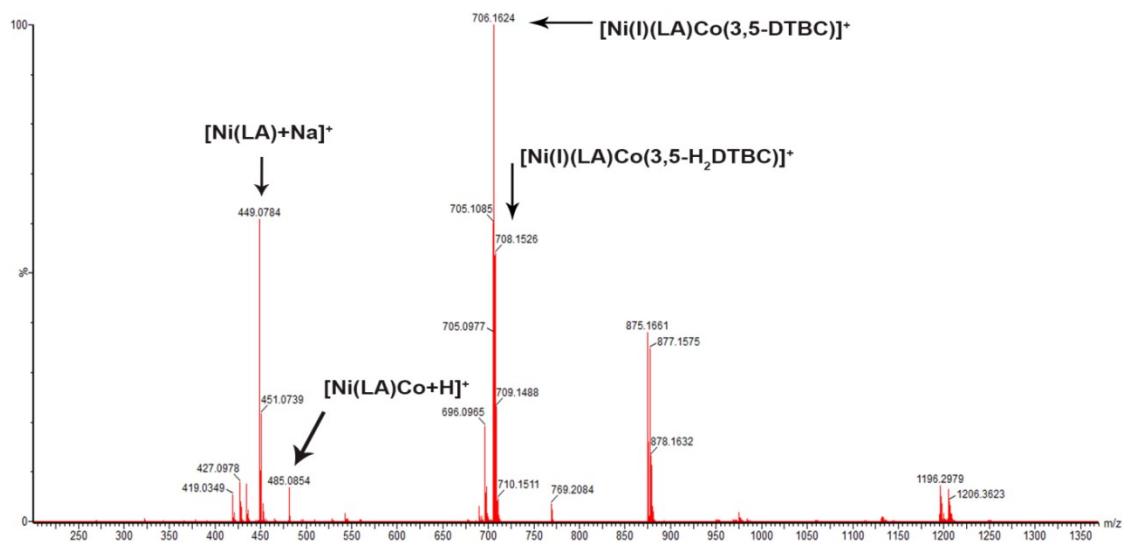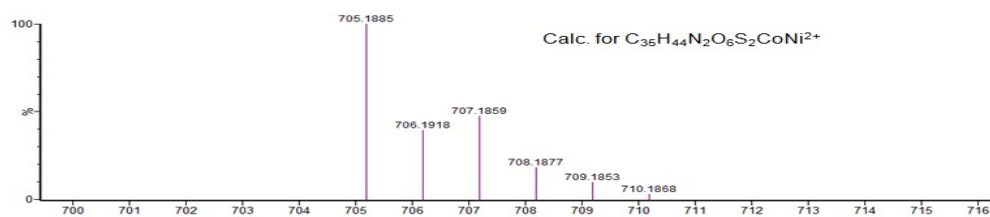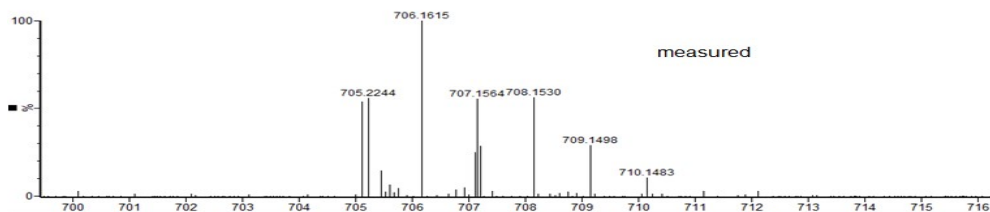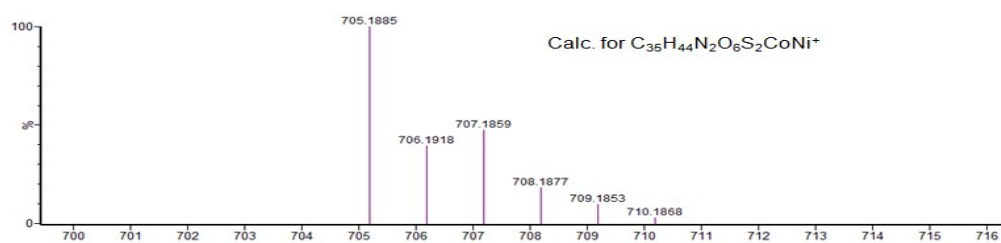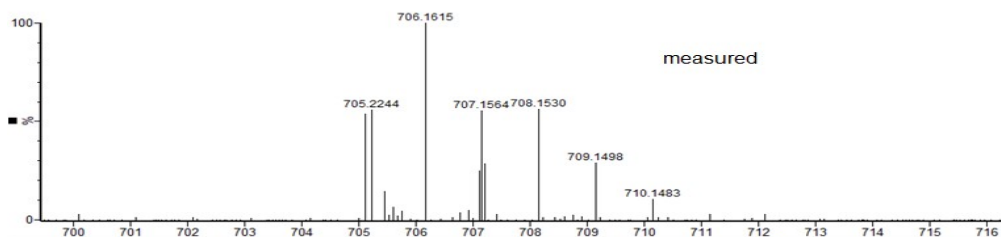

**Fig. S7:** ESI-MS analyses with isotopic distribution of complex 1 with 3,5-DTBC



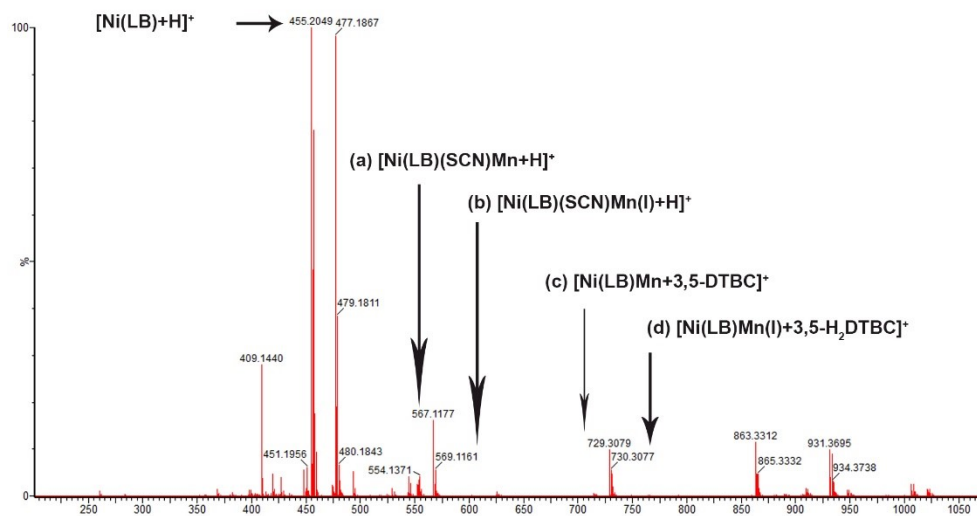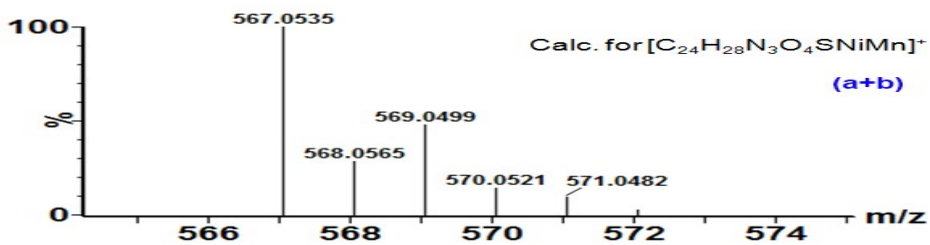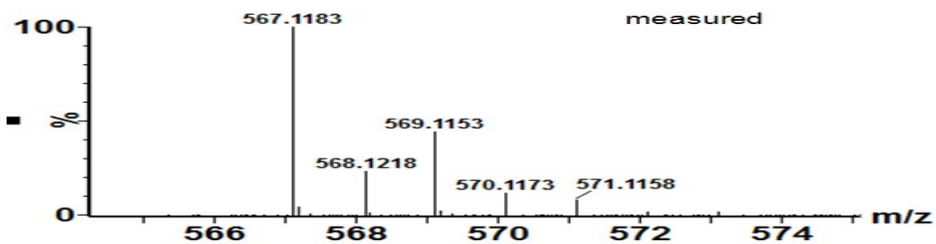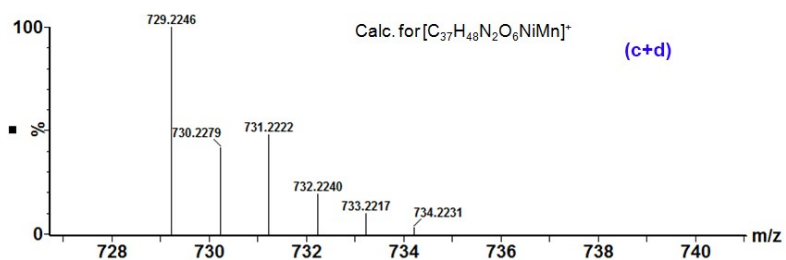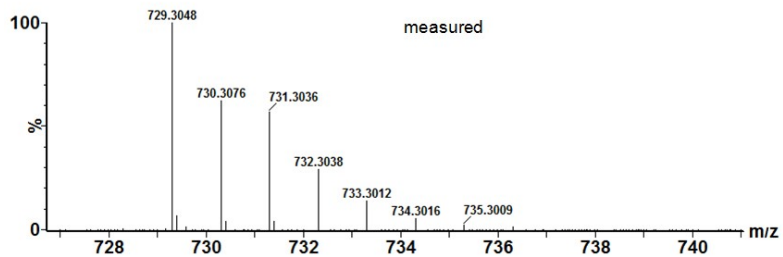

Fig. S8: ESI-MS analyses with isotopic distribution of complex 2 with 3,5-DTBC

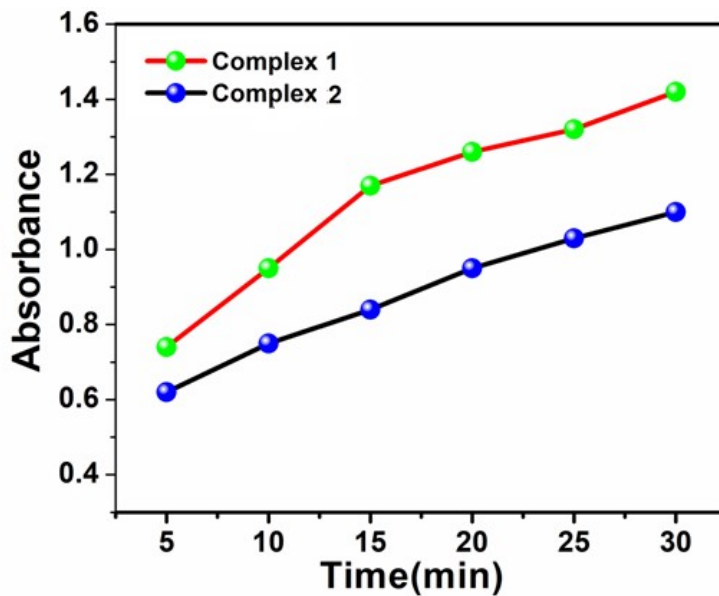

**Fig. 9:** Change of absorbance plot with respect to time for estimation of  $\text{H}_2\text{O}_2$ , generated during catalysis in presence of complexes **1** and **2**

**Experimental details:** Equal volumes of Complex **1**, **2**, and catechol solutions were prepared and mixed as per the requirement to investigate kinetic studies. After an hour, the solution was acidified with  $\text{H}_2\text{SO}_4$  to convert the pH of the solution to 2 and then an equal volume of water was added to the solution, to prevent any further oxidation. The quinone (3,5-DTBQ) was formed as a product and it was extracted with dichloromethane. After that 1 mL of a 10% solution of KI was mixed with the aqueous layer followed by the addition of three drops of 3% ammonium molybdate solution and the formation of  $\text{I}^{3-}$  was monitored spectrophotometrically by enhancement of its characteristic absorption band at  $\lambda = 353 \text{ nm}$  ( $\epsilon = 26000 \text{ M}^{-1}\text{cm}^{-1}$ ).

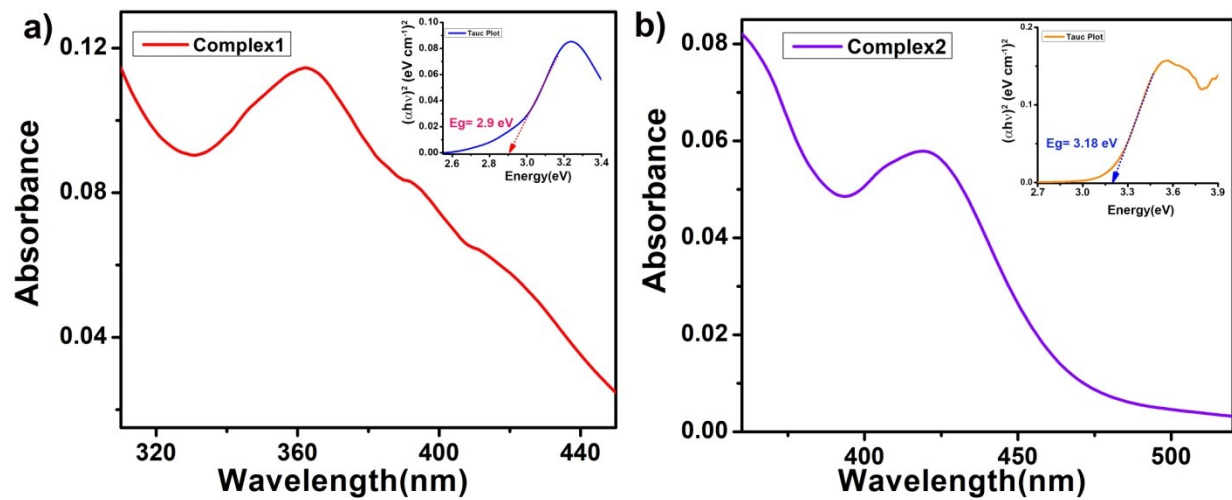

Fig. S10: Band gap energy calculation plot of complex 1, 2
